# Supplementary material for: Correlation between organic residuals of green synthesized nanoparticles and resistive switching behavior
Source: PubMed Central journal article supplement — RSC Adv. 2024 Nov 13;14(49):36340–50. doi: 10.1039/d4ra04381b (PMC11559395; doi:10.1039/d4ra04381b), 2024-11-13
Supplement: RA-014-D4RA04381B-s001.pdf [file RA-014-D4RA04381B-s001.pdf]

## SUPPORTING INFORMATION

### Synaptic Behavior in Analog Memristors Based on Green-Synthesized ZnO Nanoparticles

Trung Bao Ngoc Duong<sup>a,b,c</sup>, Phu-Quan Pham<sup>a,b</sup>, Anh Thuy Tran<sup>a,b</sup>, Dat Tan Bui<sup>a,b</sup>,  
Anh Tuan Thanh Pham<sup>b,d</sup>, Tien Cam Thi Nguyen<sup>b,c</sup>, Linh Ho Thuy Nguyen<sup>b,e</sup>, Thuy  
Dieu Thi Ung<sup>f</sup>, Nam Vu Hoang<sup>a,b,\*</sup>, Ngoc Kim Pham<sup>a,b,\*</sup>

<sup>a</sup> Faculty of Materials Science and Technology, University of Science, Ho Chi Minh City, Vietnam

<sup>b</sup> Vietnam National University, Ho Chi Minh City, Vietnam

<sup>c</sup> Faculty of Biology and Biotechnology, University of Science, Ho Chi Minh City, Vietnam

<sup>d</sup> Laboratory of Advanced Materials, University of Science, Ho Chi Minh City, Vietnam

<sup>e</sup> Center for Innovative Materials & Architectures, Ho Chi Minh City, Vietnam

<sup>f</sup> Institute of Material Science, Vietnam Academy of Science and Technology, Hanoi, Vietnam

---

---

\* Corresponding author: Nam Hoang Vu, **E-mail:** [vhnam@hcmus.edu.vn](mailto:vhnam@hcmus.edu.vn)

\* Corresponding author: Ngoc Kim Pham, **E-mail:** [phamkngoc@hcmus.edu.vn](mailto:phamkngoc@hcmus.edu.vn)

## 1. Nanostructures of commercial ZnO NPs

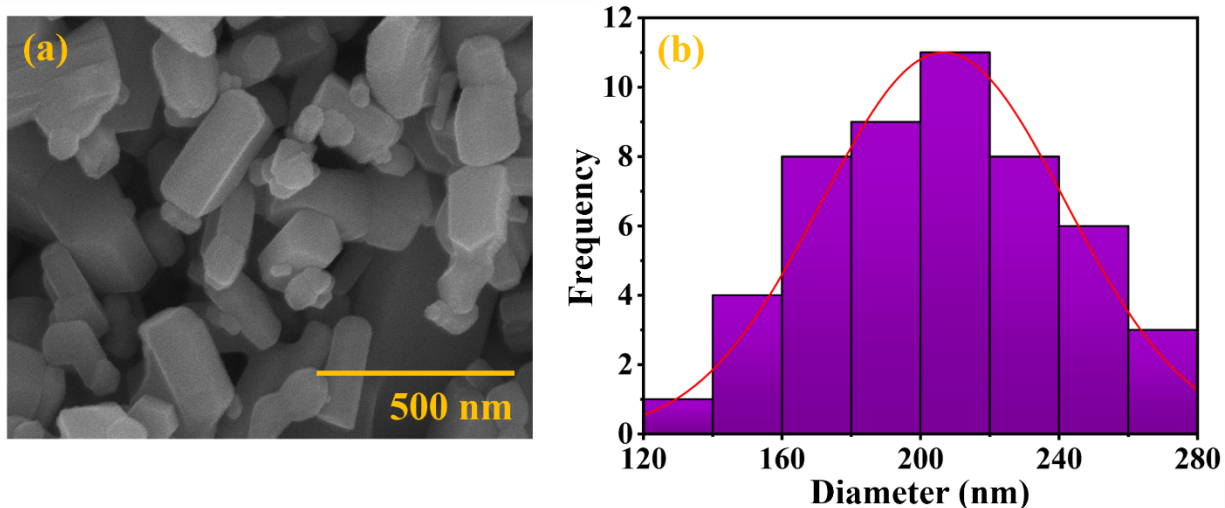

Figure S1. (a) The SEM images and (b) size distribution of commercial ZnO NPs

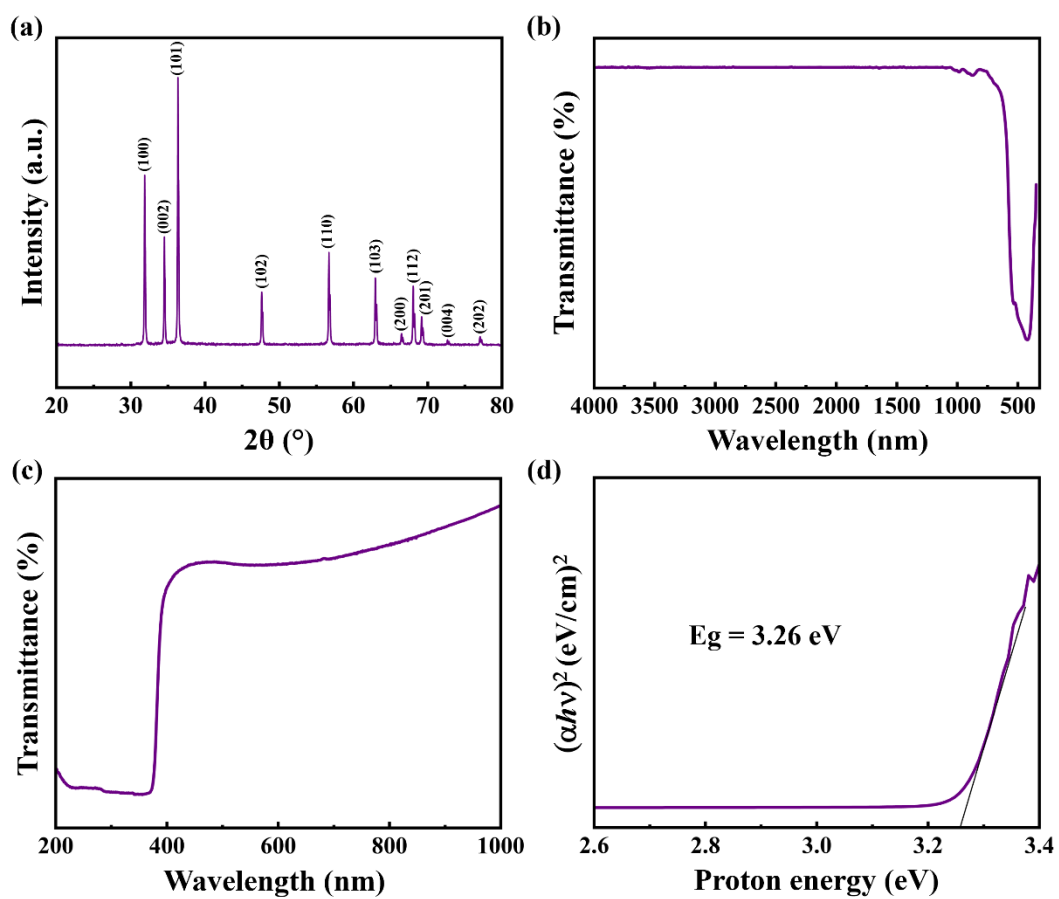

Figure S2. (a) XRD pattern, (b) The FTIR spectrum, (c) DRS and (d) Tauc plot of commercial ZnO NPs

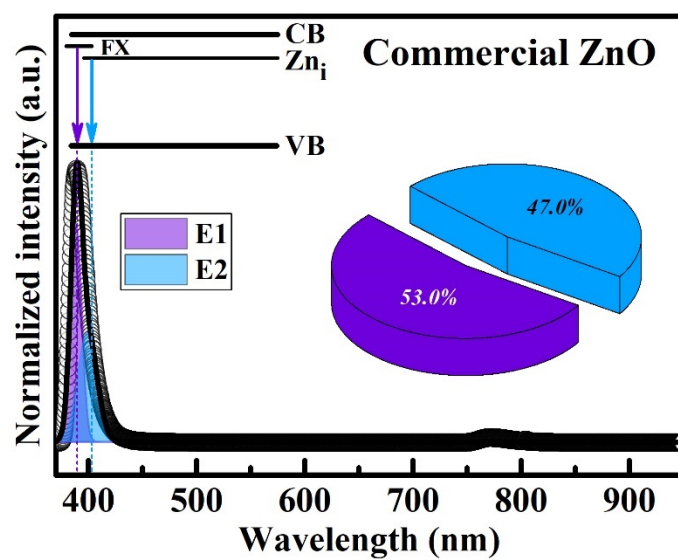

**Figure S3.** Photoluminescence analysis attaching with possible electronic transition diagram of commercial ZnO sample. The pie chart depicts the contribution of resolved emissions to the total spectrum.
